# Supplementary material for: Hysteresis of tropical forests in the 21st century
Source: PubMed Central journal article supplement (PMC7536390; doi:10.1038/s41467-020-18728-7), 2020-10-05
Supplement: 41467_2020_18728_MOESM3_ESM.pdf [file 41467_2020_18728_MOESM3_ESM.pdf]

## **Description of Additional Supplementary Files**

File Name: Supplementary Data 1

Description: The data to reproduce Figure 2.
